# Supplementary material for: Comparative limb proportions reveal differential locomotor morphofunctions of alligatoroids and crocodyloids
Source: R Soc Open Sci. 2018 Mar 7;5(3):171774. doi: 10.1098/rsos.171774 (PMC5882705; doi:10.1098/rsos.171774)
Supplement: Tables S1-S6 [file rsos171774supp1.xlsx]

## Sheet: Table S1
Table S1. Specimens, locality information, and raw measurements for limbs and trunk. All measurements are in mm.
Taxon	Specimen #	Locality	Humerus length	Ulna length	Metacarpal III length	Femur length	Tibia length	Metatarsal III length	Trunk length (C3-D15)
Alligator mississippiensis	AMNH 31563	NA	192.6	140.8	48.4	208.2	162.2	98.1	804.5
Alligator mississippiensis	AMNH 43315	USA, Florida	183.5	126	42.9	204	156.6	87	676.5
Alligator mississippiensis	AMNH 43316	NA	140.47	107.59	39.47	157.11	121.02	75.78	563.07
Alligator mississippiensis	UF 34788	USA, Florida, Alachua Co., Gainesville	125.9	93.7	30.3	137.8	110.8	65.9	NA
Alligator mississippiensis	UF 35129	USA, Florida, Alachua Co., Gainesville, Lake Alice	231.6	165.7	54.5	247.8	182.2	107.1	895.45
Alligator mississippiensis	UF 37231	USA, Florida, Palm Beach Co., Loxahatchee Refuge	92.7	71.6	24.7	105.7	85.5	53.9	388.1
Alligator mississippiensis	UF 39098	USA, Florida, Palm Beach Co., Loxahatchee Refuge	61.2	46.3	15.2	70.9	58.7	35.8	NA
Alligator mississippiensis	UF 39106	USA, South Carolina, Aiken Co., Svannah River Plant	165.7	121.4	41.2	185.2	141	84.9	684.4
Alligator mississippiensis	UF 39622	USA, Florida, Palm Beach Co., Loxahatchee Refuge	78.69	59.1	20.3	89.5	72.9	45.3	324.2
Alligator mississippiensis	UF 40535	USA, Florida, Palm Beach Co., Loxahatchee Refuge	58.01	45.4	15.7	66.7	57.2	35.1	NA
Alligator mississippiensis	UF 42474	USA, Florida, Palm Beach Co., Loxahatchee Refuge	48.4	36.9	12.9	55.6	46.1	29.5	NA
Alligator mississippiensis	UF 134586	NA	254.2	163.4	57.2	283	188	122.1	1166.3
Alligator mississippiensis	YPM R10503	USA, Georgia, Chatham County	162.34	116.96	37.8	171.99	135.19	79.55	655.615
Alligator mississippiensis	YPM R17123	USA, Louisiana, Cameron Parish	97.67	75.58	25.33	112.32	91.34	54.8	386.52
Alligator mississippiensis	ZSM 12/1951	NA	76.2	61.4	21.2	86.4	70.8	45.4	NA
Alligator sinensis	AMNH 23903	China, Anhwei, Wuhu	73.9	52.6	18	86.7	72.8	46.8	318.7
Alligator sinensis	AMNH 23904	China, Anhwei, Wuhu	83.5	58.8	19.7	97.6	80.3	50.9	371.3
Alligator sinensis	AMNH139673	NA	91.6	65.9	22.1	107.8	86.6	54.2	NA
Alligator sinensis	BMNH 1954.1.7.30	NA	148.3	110.3	37.6	164.1	128.6	78.7	595.7
Alligator sinensis	FMNH 31302	China, Anhwei	62.58	44.64	14.83	73.85	61.17	39.54	NA
Alligator sinensis	MCZ 17550	China, Anhwei, Wuhu	70.9	50.3	18.1	85.5	70.3	45.4	317.6
Alligator sinensis	UF 67829	NA	102.6	73.4	25.5	123.2	97.2	62.5	NA
Alligator sinensis	USNM 292078	NA	122.32	84.3	28.42	147.08	113.74	70.6	NA
Caiman crocodilus	AMNH 5239	Colombia	63	49.8	14.9	77.1	62.3	40.8	NA
Caiman crocodilus	AMNH 20584	NA	150.6	119.6	41.1	165.7	132	82.3	NA
Caiman crocodilus	AMNH 137179	NA	57.8	45.1	14.2	69.6	55.2	36.6	NA
Caiman crocodilus	FMNH 13062	Venezuela	79.315	61.15	19.375	98.55	78.935	50.205	NA
Caiman crocodilus	MCZ 5082 (Mook 1921)	Central America	58.8	45.9	14	72.5	57	36	NA
Caiman crocodilus	UF 19067	NA	55.2	44	14	70	58.2	35.6	259.7
Caiman crocodilus	UF 99067	South America	44	34.6	10.7	53.8	44.9	29.4	202.5
Caiman crocodilus	USNM 102874	Panama, Madden Lake	73.76	57.65	16.94	91.61	72.51	46.59	318.89
Caiman crocodilus	ZIT Rept. 85	Surinam	40.1	32.2	10.9	51.4	40.3	26.1	NA
Caiman yacare	AMNH 97296	Bolivia, Beni	105.8	80.8	26	138.7	106.1	67.1	NA
Caiman yacare	AMNH 97297	Bolivia, Beni	79.3	62.7	17.1	102.4	80.9	50	NA
Caiman yacare	AMNH 97300	Bolivia, Beni	122.4	94.8	29.7	153.9	120.7	77.5	617.45
Caiman yacare	AMNH 97305	Bolivia, Beni	114	86.4	27.5	148.1	110.8	70.1	NA
Caiman yacare	FMNH 9150	Brazil, Matto Grosso, Paraguay River	172.2	126.235	38.105	182.2	138.035	83.445	NA
Caiman latirostris	MCZ 2854a	Brazil	91.9	69.3	21.2	115.3	91.1	59.3	NA
Caiman latirostris	MCZ 4981	Brazil	63.4	48	14.6	79.1	63.9	42.2	283.8
Melanosuchus niger	AMNH 97325	Bolivia, Beni	85.3	62.9	21.7	110.6	86.7	61.5	NA
Melanosuchus niger	FMNH 218507	Equador, Napo Province	92.8	68.3	23.2	116.9	94.5	64.9	433.5
Melanosuchus niger	MCZ 4043 (Mook 1921)	Brazil, Amazonas/Rondonia, Madeira?	149.4	106.2	36	190.2	152	92	NA
Melanosuchus niger	UF 66428	NA	85.6	61.8	19.9	110.7	84.2	57.4	410.5
Melanosuchus niger	UF 72914	NA	134.2	102.1	32.1	166.5	130.1	88.1	692.8
Paleosuchus palpebrosus	FMNH 42703	Colombia, Villavicencio	48.2	38.2	11.1	61.3	49.8	31.7	240.4
Paleosuchus palpebrosus	AMNH 78976	Colombia, Amazonas, Cano Negro	70.8	53.1	15.3	89.2	72.7	42.1	305.8
Paleosuchus palpebrosus	AMNH 93812	NA	71.2	55.6	15.2	91	74	44.9	NA
Paleosuchus palpebrosus	AMNH 97326	Brazil, Rondonia	78.6	59.7	18.2	101.7	81	48.3	NA
Paleosuchus palpebrosus	UF 87980	NA	42	34.5	11	54.6	46.7	28.8	200.1
Paleosuchus trigonatus	AMNH 66391	NA	60.4	46.9	14.1	76.9	60.8	36.5	NA
Paleosuchus trigonatus	ZSM 149/1911	Brazil	57.3	44.1	12	71.4	57.8	34.6	NA
Crocodylus acutus	AMNH 7121	NA	182.4	131.4	42	201.4	144.4	91.6	NA
Crocodylus acutus	AMNH 7168	NA	167.8	119.4	37.5	184.5	135.2	83.8	727.7
Crocodylus acutus	AMNH 15182 (Mook 1921)	Nicaragua	80.4	59.6	18	90.1	69	42.5	NA
Crocodylus acutus	FMNH 22030	Honduras, Lake Ticamaya	228.87	166.82	49.63	238.19	180.78	111.73	NA
Crocodylus acutus	UF 54208	Haiti, Dept. du Sud	87.7	63.4	18.3	96.8	75.8	45.7	353
Crocodylus acutus	UF 56580	USA, Florida, Dade Co., Turkey Pt.	233.3	169.5	55.1	248.9	184.5	113.4	1014.7
Crocodylus acutus	UF 150402	USA, Florida, Monroe Co., Key Largo	93.2	68.6	21.4	100.8	79.6	50.7	377.7
Crocodylus johnsoni	NTM R25705	NA	135.39	97.14	29.42	152.68	110.35	71.98	629.61
Crocodylus johnsoni	NTM R26850	Australia, Northern Territory: Bullita Station, Homestead	43.85	30.65	9.06	52.26	39.72	25.59	NA
Crocodylus johnsoni	QM J47916	Australia, Queensland: Elizabeth Gorge, Bowthorn Station	103.85	72.65	21.16	116.38	86.02	55.51	NA
Crocodylus johnsoni	QM J58446	Australia, Queensland: Cooper Creek, ~6 km south of Windorah	108.21	77.44	23.13	120.74	88.34	56.83	498.35
Crocodylus johnsoni	QM J60590	Australia, Queensland: Amber Station, pool 1	86	59.34	17.82	98.96	73.33	47.71	377.65
Crocodylus johnsoni	QM J60591	Australia, Queensland: Springfield Station, pool 5	88.56	61.57	18.62	100.61	75.16	47.98	NA
Crocodylus johnsoni	QM J84415	Australia, Queensland: Donkey Springs, Bulleringa NP	75.2	54.82	15.44	86.06	65.95	42.48	NA
Crocodylus moreletii	UF 54813	NA	152.2	109.4	35.8	168.3	123.7	74.5	602
Crocodylus moreletii	UF 99071	NA	107	76.5	20	110.7	86.2	58.7	NA
Crocodylus niloticus	AMNH 73047	Kenya	59.9	42.4	13.1	70.3	55	35.8	NA
Crocodylus niloticus	AMNH 88634	Kenya, Garissa	77.2	54.2	16.4	86.7	67.5	43.6	NA
Crocodylus niloticus	BMNH 1969.1565	Ethiopia, southwestern Lake Abaya	251.5	165.9	47	295.3	193	116.8	1107.9
Crocodylus niloticus	IRSNB 6036	Democratic Republic of Congo, Senze	116.8	78.9	24.9	130.7	98.4	62.3	NA
Crocodylus niloticus	IRSNB 6037	Democratic Republic of Congo, Senze	74.3	53.7	17.7	84.4	65.2	43.2	NA
Crocodylus nilocitus	USNM 42150	Kenya	175	135	39.7	201.2	163.9	98.5	NA
Crocodylus novaeguineae	USNM 211292	Papua-New Guinea, Western Prov., Ali Village	44.95	32.42	10.92	55.17	43.1	28.39	NA
Crocodylus palustris	AMNH 77632	NA	79.4	58	19.3	93.2	70.5	44.3	NA
Crocodylus palustris	FMNH 51691	India	141.3	102	36.4	149.6	116.4	74.3	569
Crocodylus palustris	ZSM 2534/0	India	114.3	82.7	26.4	130.5	95.5	61.1	NA
Crocodylus porosus	AMNH 7115	NA	138.9	94.9	33	151.4	114.2	76.4	NA
Crocodylus porosus	FMNH 22026	India	222.7	146.1	39.9	249.7	173.8	108.9	954.7
Crocodylus porosus	NTM R16036	Australia, Northern Territory: Mary River, Jimmy's Creek	320.5	222	74.1	360.5	241.5	153	1335.39
Crocodylus porosus	QM J48126	Australia, Queensland: Murray River mouth, northern Tully	285	167.11	56.84	317	212.2	131.98	1266.38
Crocodylus porosus	USNM 61206	Indonesia, Celebes	201.7	130	43.2	221.2	155.5	99.7	871
Crocodylus porosus	ZIT Mamm. 196	Indonesia, Celebes	283.4	178.4	59.2	311.6	209	134.7	NA
Crocodylus rhombifer	AMNH 57773	Cuba	128.3	93.2	25.9	157.2	115	64.3	544.6
Crocodylus rhombifer	AMNH 77595	NA	106.01	83.09	21.47	136.12	97.93	56.12	428.9
Crocodylus rhombifer	FMNH 34677	Cuba	105.9	83	21.9	129.3	98.3	56.1	448.1
Crocodylus rhombifer	UF 45189	Cuba, Isle of Pines	144.3	112.2	28.9	189.6	127.8	74.2	619.9
Gavialis gangeticus	AMNH 88316	NA	112.6	67.5	24.1	127.5	95.4	59.2	568.9
Gavialis gangeticus	AMNH 110145	NA	164	91.7	30	189.9	137.6	84.3	875.3
Gavialis gangeticus	FMNH 82681	NA	74.96	46	16.53	86.44	65.78	42.81	386.8
Gavialis gangeticus	UF 70592	Nepal, Narayani River, Chituun National Park	66.2	39.9	12.8	75.7	56.6	36.8	339.1
Gavialis gangeticus	UF 118998	NA	188.5	110.5	35.4	217.5	176.9	115.3	966.5
Gavialis gangeticus	ZIT Rept. 53	India, Indus Bay, Dera Ismail Khan	146.2	80.8	28.2	173.9	122.9	75.7	NA
Mecistops cataphractus	AMNH 73803	NA	58.1	43	14	66.9	52.6	31.6	NA
Mecistops cataphractus	IRSNB 5233	Democratic Republic of Congo, Alvertville	146.5	105	32.1	176.3	130.9	78.8	NA
Mecistops cataphractus	MCZ 175004	West Africa	61.6	45.1	14.1	72.1	56.5	33.3	NA
Osteolaemus tetraspis osborni	AMNH 10083	Congo, Niapu	84.4	65.9	19.5	103.4	81.1	46.8	NA
Osteolaemus tetraspis	AMNH 69057	NA	85.8	65.6	21.5	105.4	84.3	48.9	363.2
Osteolaemus tetraspis	BMNH 1983.1130	NA	89.3	70.2	21.4	105.7	84.3	48.5	NA
Osteolaemus tetraspis	UF 34784	NA	61.7	46.6	13.6	71.3	61	34.6	NA
Osteolaemus tetrapsis	UF 99068	NA	108.2	81	24.3	122.6	97.5	56.2	NA
Osteolaemus tetraspis	USNM 194448	Ivory Coast	66.3	50.93	14.67	80.95	65.44	36.6	NA
Tomistoma schlegelii	AMNH 113078	NA	143.2	100	29.9	161	126.1	75.3	687.3
Tomistoma schlegelii	FMNH 206755	NA	183.1	119.3	38	200.9	150.1	91	806.7
Tomistoma schlegelii	HoUM unnumbered	NA	162.8	107.6	30.04	199.215	142.08	84.37	NA
Tomistoma schlegelii	MCZ 12459	Borneo, Sarawak River	181.5	117.6	31.7	221.1	157.8	97	801.4
Tomistoma schlegelii	UF 54210	NA	132.8	94.3	28.1	152	114	73.9	609.5
Tomistoma schlegelii	UF 72817	NA	54.58	35.9	10.3	58.5	44.1	27.9	NA
Tomistoma schlegelii	UF 107493	NA	190.5	124.6	34	209.4	155.1	87	830.8
Tomistoma schlegelii	USNM 52972	Indonesia, Borneo, Samarinda	179.6	115	33.4	208.3	150.1	95.1	767.6

## Sheet: Table S2
Table S2. Measurements of rostral proportions (RPs: ratio of the palate width at the last maxillary alveoli to the length from there to the tip of the snout) in extant crocodylian individuals. Species RPs (Table 1) were obtained by averaging individual RPs for each species (skull width ≥ 100 mm).
Taxon	Specimen #	Locality	Skull length (mm)	Skull width (mm)	Rostral proportion
Alligator mississippiensis	YPM R 17123	USA, Lousiana, Cameron Parish, Rockefeller Wildlife Refuge	210.07	103.38	0.584383
Alligator mississippiensis	UF 50125	USA, Florida, Wakulla Co., US 319, at Ochlocknae River	262.3	146.6	0.691729
Alligator mississippiensis	UF 87885	USA, Florida, Broward County, Water Conservation Area #3	268	136.9	0.621294
Alligator mississippiensis	UF 121384	USA, Florida, Pasco Co.	269.3	141	0.630837
Alligator mississippiensis	UF 43151	USA, Florida, Wakulla Co., US 319, at Ochlocknae River	326	173.5	0.675
Alligator mississippiensis	YPM R 10503	USA, Georgia, Chatham County, Savannah River	348	188	0.660202
Alligator mississippiensis	ZSM 4/1921	USA	355	192.3	0.706053
Alligator mississippiensis	UF 67824	USA, Florida, Putnam County, 4 Km SE Melrose	358	200.6	0.693267
Alligator mississippiensis	UF 105541	USA, Florida, Broward County, Water Conservation Area #3	367	192.4	0.621287
Alligator mississippiensis	ZMB 36624	NA	368	189.3	0.616404
Alligator mississippiensis	UF 98341	USA, Florida, Broward County, Water Conservation Area #3	425	234	0.62069
Alligator mississippiensis	UF 42872	USA, Florida, Walulla Co., Sopchoppy River	446	258.3	0.666386
Alligator mississippiensis	UF 33552	USA, Florida, Lake Co., Lake Griffin	465	288	0.738272
Alligator mississippiensis	ZSM 2530/0	USA, Mississippi River	474	281.7	0.723757
Alligator mississippiensis	UF 10941	USA, Florida, Evergrades	495	282	0.688312
Alligator mississippiensis	UF 39618	USA, Florida, Orange Co., Lake Apopka	504	319	0.703431
Alligator mississippiensis	UF 42548	USA, Florida, Clay Co., St. John River at Green Cove Springs	508	318	0.742466
Alligator mississippiensis	UF 84197	USA, Florida, Polk Co.	525	293	0.691892
Alligator sinensis	ZSM 178/1947	China	188.8	118.1	0.86217
Alligator sinensis	IVPP 1335	China	214.3	136.16	0.780282
Alligator sinensis	USNM 52557	China, Zhejiang Huchow, near Moffett, L. J.	165.07	100.94	0.72
Caiman crocodilus crocodilus	ZSM 100/1911	Brasil, Insel Marajo, Fazenda Arary am oberen Rio Arary	169.3	105	0.636687
Caiman crocodilus crocodilus	ZSM 56/1936	Venezuela, Maracay	175.5	108.9	0.703608
Caiman crocodilus crocodilus	ZSM 206/1925	Bolivia, Rio Madidi	188.7	111.1	0.620219
Caiman crocodilus crocodilus	ZSM 109/1933	Venezuela, Maracay	195.7	114.2	0.647696
Caiman crocodilus crocodilus	ZSM 112/1933	Venezuela, Maracay	215	131.7	0.626829
Caiman crocodilus crocodilus	ZSM 10/1911	Brasil, Insel Marajo, Fazenda Menino Jesus am oberen Rio Arary	237.6	148.6	0.658537
Caiman crocodilus crocodilus	ZSM 104/1911	Brasil, Insel Marajo, Fazenda Coniciras (2 Stunden landeinwärts vom Ararysee)	252	167.5	0.699454
Caiman crocodilus crocodilus	ZSM 4/1911	Brasil, Insel Mexiana, Fazenda Sta. Maria	290.1	179.3	0.646766
Caiman crocodilus fuscus	ZSM 70/1937	Colombia, Jesus del Rio, Dep. Bolivar	181.2	110.3	0.741477
Caiman crocodilus fuscus	ZSM 69/1937	Colombia, Jesus del Rio, Dep. Bolivar	213.9	130.6	0.732294
Caiman yacare	ZSM 168/1929	Argentina, Lapango, Gob. Formosa	181.3	107.8	0.70137
Caiman yacare	ZSM 170/1933	Paraguay, Puerto Sastre am Rio Paraguay	227.3	142.4	0.657677
Caiman yacare	USNM 281821	Bolivia, Beni, Vacadiez, Tumi Chucua, Lago Tumi Chucua	246.6	155.3	0.69697
Caiman yacare	USNM 281809	Bolivia, Beni, Vacadiez, Tumi Chucua, Lago Tumi Chucua	300.6	175.1	0.661692
Caiman yacare	ZSM 164/1929	Bolivia, San Pedro, Chiquitos	270.2	186.7	0.719251
Caiman yacare	ZSM 163/1933	Bolivia, Trinidad, Chiquitos	288	189.3	0.715365
Caiman yacare	ZSM 163/1929	Paraguay, Rio Paraguay bei Puerto Casado	269	189.9	0.780749
Caiman yacare	ZSM 162/1929	Argentina, Mittellauf des Bermejo Norvanns?, Gob. Formosa	310.5	209.8	0.776
Caiman yacare	ZSM 169/1933	Paraguay, Rio Paraguay bei Puerto Casado, Estancia Sta Casilva	319	213.1	0.71504
Caiman latirostris	ZSM 435/1911	NA	171.1	110.3	0.807309
Caiman latirostris	ZMB 36629	Paraguay	177.6	118.1	0.863192
Caiman latirostris	ZSM 73/1926	Argentina, La Victoria, Formosa	179.1	121.5	0.937423
Caiman latirostris	ZMB 36628	Brasil, Rio Grande do Sul	209.7	144.8	0.92429
Caiman latirostris	ZMB 42396	Brasil, Rio Grande do Sul	249.7	184	0.942598
Melanosuchus niger	BMNH 1872.6.4.1	Peru, eastern Peru	212.4	110.3	0.706329
Melanosuchus niger	ZSM 80/1911	Brasil, Insel Marajo, Igarapi bei der Fazenda Arary am mittleren Rio Arary	297	152	0.631271
Melanosuchus niger	ZSM 87/1911	Brasil, Insel Marajo, Fazenda Menino Jesus am oberen Rio Arary	290	155.2	0.644454
Melanosuchus niger	ZSM 79/1911	Brasil, Insel Marajo, Fazenda Menino Jesus am oberen Rio Arary	301.3	165.1	0.67624
Melanosuchus niger	ZSM 76/1911	Brasil, Insel Marajo, Lago Camaleaosal bei Cachoeira am Rio Arary	296.2	166.2	0.686747
Melanosuchus niger	ZSM 85/1911	Brasil, Insel Marajo, Fazenda Menino Jesus am oberen Rio Arary	307	169.1	0.739496
Melanosuchus niger	ZSM 84/1911	Brasil, Insel Marajo, Fazenda Menino Jesus am oberen Rio Arary	310	172.1	0.669098
Melanosuchus niger	ZSM 73/1911	Brasil, Insel Marajo, Fazenda Menino Jesus am oberen Rio Arary	340	177.7	0.678195
Melanosuchus niger	ZSM 86/1911	Brasil, Insel Marajo, Fazenda Menino Jesus am oberen Rio Arary	328	179.8	0.691011
Melanosuchus niger	ZSM 90/1911	Brasil, Insel Marajo, Fazenda Menino Jesus am oberen Rio Arary	331	183.5	0.706395
Melanosuchus niger	ZSM 3/1911	Brasil, Insel Marajo, Fazenda Menino Jesus am oberen Rio Arary	364	198.5	0.679348
Melanosuchus niger	ZSM 89/1911	Brasil, Insel Marajo, Fazenda Menino Jesus am oberen Rio Arary	351	200	0.707831
Melanosuchus niger	ZSM 68/1911	Brazil, Marajo Island, Fazenda Menino Jesus on the upper Rio Arary	351	201.8	0.733129
Melanosuchus niger	ZSM 75/1911	Brazil, Marajo Island, Fazenda Menino Jesus on the upper Rio Arary	352	203.9	0.712209
Melanosuchus niger	ZSM 46/1911	Brazil, Marajo Island, Fazenda Menino Jesus on the upper Rio Arary	380	202.6	0.635518
Melanosuchus niger	ZSM 64/1911	Brazil, Marajo Island, Fazenda Menino Jesus on the upper Rio Arary	394	228.2	0.699084
Melanosuchus niger	ZSM 62/1911	Brazil, Marajo Island, Fazenda Menino Jesus on the upper Rio Arary	414	233.9	0.675165
Melanosuchus niger	ZSM 57/1911	Brazil, Marajo Island, Fazenda Menino Jesus on the upper Rio Arary	431	255.4	0.696742
Melanosuchus niger	ZSM 52/1911	Brazil, Marajo Island, Fazenda Menino Jesus on the upper Rio Arary	441	262	0.669377
Melanosuchus niger	ZSM 63/1911	Brazil, Marajo Island, Cachoeira on the middle Rio Array	494	305	0.713568
Melanosuchus niger	ZSM 223/1925	Bolivia, Cachouela Esparanga (10 h from Ribralta), Rio Beni	513	337	0.746795
Paleosuchus palpebrosus	ZSM 42/1938	Brasil, Rio Ivinheima (Oberhalb Lager 4), ca. 28 km flussaufwärts von der Mündung in den Parana	180.4	104.7	0.61939
Paleosuchus palpebrosus	ZSM 44/1938	Brasil, Rio Ivinheima (Oberhalb Lager 4), ca. 28 km flussaufwärts von der Mündung in den Parana	175.5	104.8	0.604706
Paleosuchus palpebrosus	ZSM 43/1938	Brasil, Rio Ivinheima (Oberhalb Lager 4), ca. 28 km flussaufwärts von der Mündung in den Parana	189.2	112.8	0.630607
Paleosuchus palpebrosus	ZSM 207/1925	Brasil, Manacapuru am Solimoeus, Staat Amazonas	209.1	123.1	0.579082
Paleosuchus palpebrosus	ZSM 41/1938	Brasil, Rio Ivinheima (Oberhalb Lager 4), ca. 28 km flussaufwärts von der Mündung in den Parana	200	126	0.661458
Paleosuchus trigonatus	FMNH 69882	Colombia, Amazonas Intendencia, Rio Apaporis	203.8	101.9	0.526072
Paleosuchus trigonatus	ZSM 520/1911	Surinam	244.8	133.8	0.609513
Crocodylus acutus	SMF 42808	El Salvador	230.6	103.6	0.443612
Crocodylus acutus	FMNH 5775	Honduras, Lake Ticamaya	235.19	108.72	0.435792
Crocodylus acutus	FMNH 5776	Honduras, Lake Ticamaya	244	113.14	0.43808
Crocodylus acutus	FMNH 74924	Colombia, Bolívar, Isla Fuerte	259.46	107.08	0.397802
Crocodylus acutus	YPM R15100	Mexico, Jalisco State, Chamela Bay West	268.91	124.94	0.466809
Crocodylus acutus	FMNH 20159	Guatemala, Escuintla, Tiquisate, Conception del Mar	294	135.7	0.43186
Crocodylus acutus	ZSM 122/1908	Jamaica	297.1	138.9	0.485646
Crocodylus acutus	SMF 42956	El Salvador	299	142.3	0.443956
Crocodylus acutus	USNM 258735	Belize, Stann Creek	309.8	151.9	0.498998
Crocodylus acutus	SMF 30007	Cuba	316.3	149.1	0.480687
Crocodylus acutus	FMNH 11041	Belize, Belize	341	159.66	0.444741
Crocodylus acutus	ZSM 74/1937	Colombia, Jesus del Rio, Dep. Bolívar	347	167.2	0.432251
Crocodylus acutus	FMNH 74923	Colombia, Bolívar, Isla Fuerte	357	160.95	0.449365
Crocodylus acutus	ZSM 73/1937	Colombia, Jesus del Rio, Dep. Bolívar	366	178.3	0.462362
Crocodylus acutus	FMNH 13220	Honduras, Lake Ticamaya	370	184.49	0.445205
Crocodylus acutus	AMNH R 9659	Florida	400	212	0.526786
Crocodylus acutus	FMNH 11038	Honduras, Lake Ticamaya	404	212.8	0.503494
Crocodylus acutus	USNM 115353	Mexico, Guerrero, Acapulco, Laguna Coyuca	420	215	0.490722
Crocodylus acutus	ZSM 137/1926	Columbia, Rio Lebrija	434	216.1	0.496599
Crocodylus acutus	USNM 247943	Panama, Colon, Barro Colorado Island, Barbour Point	443	216.6	0.463617
Crocodylus acutus	FMNH 69886	Colombia, Magdalena, Cienaga Grande, Cano de Las Mujeres	486	267.66	0.53349
Crocodylus acutus	FMNH 73755	Colombia, Magdalena	526	289	0.564706
Crocodylus acutus	ZSM 72/1929	Nicaragua, Lake Managua	540	271.5	0.449649
Crocodylus acutus	FMNH 59070	Panama, Canal Zone	591	301	0.473799
Crocodylus acutus	FMNH 59071	Panama, Canal Zone, Chagres River, near Juan Mina	600	323	0.528736
Crocodylus johnsoni	USNM 299810	Australia, Western territory, Mckinlay River	281.2	123.3	0.401653
Crocodylus johnsoni	SMF 54424	Australia, Queensland	304	122.1	0.329741
Crocodylus johnsoni	SMF 54425	Australia, Queensland	304	123.6	0.340122
Crocodylus johnsoni	SMF 54427	Australia, Queensland	341	129.7	0.321063
Crocodylus johnsoni	SMF 54426	Australia, Queensland	342	141.4	0.356223
Crocodylus johnsoni	AMNH R86540	Australia, Queensland	393	165.7	0.366167
Crocodylus niloticus	IRSNB 5007	Tanzania, Luapula	239.1	118.6	0.507937
Crocodylus niloticus	IRSNB 6036	Democratic Republic of Congo, Senze	261.2	137.7	0.514824
Crocodylus niloticus	IRSNB 5006	Tanzania, Luapula	279	146.9	0.583979
Crocodylus niloticus	IRSNB 5011	Tanzania, Luapula	374	214.1	0.587601
Crocodylus niloticus	IRSNB 5010	Tanzania, Luapula	411	237.6	0.630854
Crocodylus niloticus	IRSNB 3310	Democratic Republic of Congo, Pweto, Haut-Katanga	409	239.1	0.549187
Crocodylus niloticus	IRSNB 5003	Tanzania, Luapula	424	262.3	0.62954
Crocodylus niloticus	IRSNB 5008	Tanzania, Luapula	433	266.3	0.667606
Crocodylus niloticus	IRSNB 5002	Tanzania, Luapula	475	280	0.644472
Crocodylus niloticus	IRSNB 5009	Tanzania, Luapula	457	280.3	0.602122
Crocodylus niloticus	IRSNB 5012	Democratic Republic of Congo, Luapula	461	294.8	0.689083
Crocodylus niloticus	IRSNB 3633	Tanzania, Rukwa Lake	591	393	0.675301
Crocodylus novaeguineae	USNM 211298	Papua New Guinea, Western Prov., Balimo Subprob., Makapa Village Lagoon, Aramia River	238	119.7	0.463497
Crocodylus novaeguineae	BMNH 1886.5.20.1	New Guinea, Fly River	250.1	130.3	0.496614
Crocodylus novaeguineae	SMF 53300	New Guinea, Sepik	258.1	123.8	0.431983
Crocodylus novaeguineae	FMNH 14047	New Guinea, Koragu, middle Sepik River	276.6	131.8	0.443098
Crocodylus novaeguineae	FMNH 14040	New Guinea	329	169.6	0.456829
Crocodylus novaeguineae	USNM 211301	Papua New Guinea, Western Prov., Balimo Subprov., Samacki River, mouth of Aramia River drainage	335.9	166.8	0.455581
Crocodylus novaeguineae	SMF 60031	New Guinea, middle Sepik, between Angoram and Ambunti	338	177.4	0.472399
Crocodylus novaeguineae	FMNH 14048	New Guinea, Koragu, middle Sepik River	351	185.8	0.496368
Crocodylus novaeguineae	FMNH 14043	Papua New Guinea, Nyourangai, Lagoon village, middle Sepik	349	195.4	0.510776
Crocodylus novaeguineae	FMNH 14039	Papua New Guinea, Nyourangai, Lagoon village, middle Sepik	391	206.7	0.503632
Crocodylus novaeguineae	FMNH 14044	New Guinea, Koragu, middle Sepik River	374	217.8	0.52954
Crocodylus novaeguineae	USNM 211290	Papua New Guinea, Western Prov., Balimo Subprov., Aramia River lagoon	372	223.2	0.556845
Crocodylus palustris	ZSM 565/1911	Sri Lanka, Hambantota	213	114.1	0.583099
Crocodylus palustris	ZSM 30/1912	India, Gangesmündung bei Calcutta	227.2	129.1	0.683561
Crocodylus palustris	ZSM 2534/0	India (from a forestman)	248.3	143.9	0.600933
Crocodylus palustris	ZSM 231/0	India	249	152.8	0.680269
Crocodylus palustris	BMNH 1848.2.5.9	India, River Raptee	250.2	138.3	0.623472
Crocodylus palustris	ZSM 612/1911	Sri Lanka, Hambantota	251.1	139	0.618644
Crocodylus palustris	BMNH 1852.5.9.46	Sri Lanka, Ceylon	274.9	156.3	0.616337
Crocodylus palustris	ZSM 274/1912	Sri Lanka, Hambantota	281.7	150.8	0.591479
Crocodylus palustris	SMF 28168	India	285.6	170.2	0.705405
Crocodylus palustris	ZSM 559/1911	Sri Lanka, Hambantota	296	162.6	0.627685
Crocodylus palustris	ZSM 542/1911	Sri Lanka, Hambantota	317	184.7	0.655836
Crocodylus palustris	ZSM 389/1907	Sri Lanka, Ceylon	318	170.2	0.550841
Crocodylus palustris	BMNH 1929.8.6.2	India, Kamara, Mysore, South India	325	187.33	0.594307
Crocodylus palustris	ZSM 517/1911	Sri Lanka, Kahatagasdigiliya	339	181.4	0.571429
Crocodylus palustris	BMNH 1868.4.9.11	India	497	311	0.729947
Crocodylus palustris	FMNH 31537	Pakistan, Sindh	500	308	0.743202
Crocodylus palustris	BMNH 1897.12.31.1	Sri Lanka, Ceylon	505	319	0.668269
Crocodylus porosus	FMNH 21907	Philippines, Mindoro, Lake Naujan	235.6	112.7	0.486486
Crocodylus porosus	FMNH 15229	North Borneo, Sandakan	254.8	124.3	0.502273
Crocodylus porosus	FMNH 63744	North Borneo, Labuk Bay, Tikus Island	281.3	129	0.474163
Crocodylus porosus	FMNH 15230	North Borneo, Sandakan	287	132.6	0.485777
Crocodylus porosus	FMNH 28467	Philippines	302	143.8	0.47957
Crocodylus porosus	FMNH 28465	Philippines	307.6	148.2	0.461227
Crocodylus porosus	FMNH 28466	Philippines	311	148	0.48643
Crocodylus porosus	ZMB 36700	Indonesia, Sumatra	319	151.4	0.475973
Crocodylus porosus	FMNH 15231	North Borneo, Sandakan	338	157.7	0.483233
Crocodylus porosus	FMNH 14031	Papua New Guinea, edge of river above Kubka	349	168.4	0.461538
Crocodylus porosus	USNM 38081	Philippines	360	178	0.503356
Crocodylus porosus	FMNH 14052	Papua New Guinea, Koragu, middle Sepick River	365	176.7	0.448464
Crocodylus porosus	FMNH 14034	Papua New Guinea, Nyourangai, Lagoon village, middle Sepik	366	172.6	0.4375
Crocodylus porosus	FMNH 15232	North Borneo, Sandakan	378	181.4	0.474983
Crocodylus porosus	FMNH 28469	Philippines	394	197.1	0.465696
Crocodylus porosus	USNM 61206	Indonesia, Celebes	430	237.5	0.514711
Crocodylus porosus	USNM 228416	Philippines, Mindanao Island	544	351	0.657957
Crocodylus porosus	FMNH 14071	Papua New Guinea, Gologapa, Keram River, south of Sepik River	564	357	0.576832
Crocodylus porosus	USNM 228412	Philippines, Mindanao Island	604	365	0.625
Crocodylus porosus	USNM 509454	Papua New Guinea, East Sepic Prov.	612	357	0.618533
Crocodylus rhombifer	AMNH 57773	Cuba	262	152	0.569444
Crocodylus rhombifer	SMF 37081	Cuba, Ciénaga de Zapata	237.6	133.7	0.600899
Crocodylus moreletii	SMF 28170	NA	240.5	157.5	0.675975
Crocodylus moreletii	SMF 28169	NA (Acquired from Kochkunst Museum)	258.7	137.5	0.580723
Crocodylus moreletii	SMF 56317	Mexico	399	274.4	0.692177
Crocodylus moreletii	ZSM 3038/0	Mexico, La Antigua	432	273.1	0.616749
Mecistops cataphractus	IRSNB 6031	Democratic Republic of Congo, Mabwe, Katanga, Upemba National Park	245.4	106.7	0.321995
Mecistops cataphractus	IRSNB 4984	Tanzania, Luapula	256.7	102	0.321041
Mecistops cataphractus	IRSNB 4985	Tanzania, Luapula	256.8	103	0.318386
Mecistops cataphractus	IRSNB 4976	Democratic Republic of Congo, Kasenga, Haut-Katanga	295.8	116.4	0.297428
Mecistops cataphractus	IRSNB 4983	Tanzania, Luapula	316.4	134.4	0.342529
Mecistops cataphractus	IRSNB 4980	Tanzania, Luapula	325	137.1	0.322368
Mecistops cataphractus	SMF 43977	Cameroon, Bonambassi	327	132.4	0.299078
Mecistops cataphractus	IRSNB 4982	Tanzania, Luapula	330	133.7	0.317016
Mecistops cataphractus	IRSNB 4977	Democratic Republic of Congo, Kasenga, Haut-Katanga	343	136.8	0.315904
Mecistops cataphractus	AMNH R160902	Democratic Republic of Congo	349	139.2	0.334917
Mecistops cataphractus	IRSNB 4979	Tanzania, Luapula	364	153	0.315556
Mecistops cataphractus	IRSNB 5233	Democratic Republic of Congo, Alvertville	378	178.5	0.334873
Mecistops cataphractus	IRSNB 4981	Tanzania, Luapula	386	165.3	0.32712
Mecistops cataphractus	IRSNB 4991	Tanzania, Luapula	388	171.2	0.365173
Mecistops cataphractus	AMNH R10075	Democratic Republic of Congo	396	155.4	0.304924
Mecistops cataphractus	IRSNB 17962	Democratic Republic of Congo, Semliki Delta, Kivu	423	180.8	0.336264
Mecistops cataphractus	IRSNB 4989	Tanzania, Luapula	454	199.8	0.360408
Mecistops cataphractus	IRSNB 4998	Tanzania, Luapula	481	209.2	0.345372
Mecistops cataphractus	BMNH 1900.2.27.1	Gabon, Ogowe	488	215.1	0.31291
Mecistops cataphractus	IRSNB 4996	Tanzania, Luapula	502	230.5	0.362031
Mecistops cataphractus	IRSNB 5225	Democratic Republic of Congo, Toa	514	226.7	0.348028
Mecistops cataphractus	IRSNB 4999	Tanzania, Luapula	516	224.1	0.321468
Mecistops cataphractus	IRSNB 4990	Tanzania, Luapula	518	238.3	0.366155
Mecistops cataphractus	IRSNB 4987	Tanzania, Luapula	528	239.2	0.358621
Mecistops cataphractus	IRSNB 4988	Tanzania, Luapula	537	246.7	0.372208
Mecistops cataphractus	IRSNB 4993	Tanzania, Luapula	537	239.9	0.342593
Mecistops cataphractus	IRSNB 4994	Tanzania, Luapula	540	243.8	0.36036
Mecistops cataphractus	IRSNB 3302	Democratic Republic of Congo, Moero	544	247	0.359155
Mecistops cataphractus	IRSNB 17963	Democratic Republic of Congo, Semliki Delta, Kivu	548	253	0.37963
Mecistops cataphractus	IRSNB 17967	Democratic Republic of Congo, Semliki Delta, Kivu	550	246.3	0.346805
Mecistops cataphractus	IRSNB 5001	Tanzania, Luapula	552	244.4	0.337209
Mecistops cataphractus	IRSNB 5000	Tanzania, Luapula	562	250.4	0.367033
Mecistops cataphractus	IRSNB 4997	Tanzania, Luapula	571	268.7	0.383908
Mecistops cataphractus	IRSNB 17964	Democratic Republic of Congo, Semliki Delta, Kivu	576	270.5	0.367538
Mecistops cataphractus	BMNH 1924.5.10.1	Tanzania, Kigoma, Tanganyika	581	236.5	0.321483
Mecistops cataphractus	IRSNB 4986	Tanzania, Luapula	594	268.9	0.377622
Osteolaemus osborni	AMNH 10083	Democratic Republic of Congo	177.4	106.8	0.738696
Osteolaemus tetraspis	ZMB 36638	Cameroon, Osidinge	176.8	105.7	0.705882
Osteolaemus tetraspis	ZMB 54447	NA	191.5	109.6	0.661064
Osteolaemus tetraspis	ZMB 36639	Cameroon, Mundami	189.5	114.8	0.689223
Osteolaemus tetraspis	SMF 59521	NA	196.7	117.4	0.734973
Gavialis gangeticus	USNM 72562	India, Uttar Pradesh Allahabad, near River Tons, Ganges River tributary	371	111.3	0.225877
Gavialis gangeticus	YPM R10514	India	418	139.63	0.222904
Gavialis gangeticus	BMNH 96.7.7.4	India, Jumna River, 30 miles below Delhi	424	139.7	0.244898
Gavialis gangeticus	BMNH specimen S of Gray 1873	India	427	134.1	0.233588
Gavialis gangeticus	ZIT Rept. 53	Pakistan, Indus Bay (Dera Ismail Khan)	449	158.5	0.280983
Gavialis gangeticus	ZSM 29/1938	India,Indus, Vorder Indien (West India)	483	174.6	0.269897
Gavialis gangeticus	ZSM 29/1912	India, Ganges	540	197.6	0.265385
Gavialis gangeticus	BMNH 61.4.1.2	India	566	209.4	0.266409
Gavialis gangeticus	BMNH 1935.6.4.1	India, Ramganga River, Bareilly, U.P.	605	229	0.267068
Gavialis gangeticus	ZSM 62/1959	Nepal, Girwa River, near Bardia (West-Nepal)	634	262.4	0.304251
Gavialis gangeticus	ZMB 36678	India, Ganges	652	256.5	0.264646
Gavialis gangeticus	ZIT Rept. 40	Pakistan, Indus Bay (Dera Ismail Khan)	668	278.1	0.317025
Gavialis gangeticus	SMF 37951	India, Jumna River	673	273.8	0.295688
Gavialis gangeticus	SMF 49529	Pakistan, Indus, bei dem Dorfe Buagsar, Baharvalpur State	674	263.6	0.295082
Gavialis gangeticus	AMNH R 7138	India	690	292.8	0.28876
Gavialis gangeticus	BMNH 2005.1601	India	722	289.6	0.280738
Gavialis gangeticus	BMNH 1847.12.20.4	India	734	307.5	0.323138
Gavialis gangeticus	BMNH 1974.3009	India, Ganges	738	314	0.324324
Gavialis gangeticus	ZSM 28/1912	India, Ganges	744	320	0.326516
Tomistoma schlegelii	BMNH 1899.1.31.1	Borneo, Sadong River	344.6	117.2	0.233068
Tomistoma schlegelii	SMF unknown	Sumatra, Singilino-fluss	382	141.3	0.245243
Tomistoma schlegelii	ZSM 232/1909	Sumatra, Sultanat Deli, Sungai Rampah	483	184.5	0.257143
Tomistoma schlegelii	SMF 28135	Sumatra, Perbaungan	499	209.9	0.267108
Tomistoma schlegelii	USNM 52972	Borneo, Samarinda	510	220.1	0.293033
Tomistoma schlegelii	ZSM 523/1909	Borneo	527	207.7	0.264574
Tomistoma schlegelii	SMF 28134	Borneo, Baram-fluss	530	201.2	0.264875
Tomistoma schlegelii	BMNH 48.10.31.19	Borneo	542	224.9	0.319911
Tomistoma schlegelii	ZSM 200/1907	Central Borneo, Poctos Libau	557	232.4	0.277935
Tomistoma schlegelii	ZSM 201/1907	Central Borneo, Sungai Mendalam	562	228.8	0.281852
Tomistoma schlegelii	BMNH 1860.11.6.8	Borneo	574	244.6	0.312925
Tomistoma schlegelii	ZSM 203/1907	Central Borneo, Sungai Mendalam	584	254.9	0.306662
Tomistoma schlegelii	ZSM 385/1907	Central Borneo, Kapoeas Gebeit	590	240.1	0.269939
Tomistoma schlegelii	ZSM 374/1907	Central Borneo, Kapoeas Gebeit	594	247.5	0.29003
Tomistoma schlegelii	ZSM 371/1907	Central Borneo, Kapoeas Gebeit	602	237.3	0.270251
Tomistoma schlegelii	USNM 211323	Indonesia, Kalimantan Sanggau, Kapuas River	665	289.4	0.322
Tomistoma schlegelii	ZSM 1/0	Borneo	674	311.4	0.335756
Tomistoma schlegelii	ZSM 376/1907	Central Borneo, Kapoeas Gebeit	681	291	0.317568
Tomistoma schlegelii	ZSM 252/1907	Central Borneo, Bika	686	323	0.342545
Tomistoma schlegelii	ZSM 395/1907	Central Borneo, Kapoeas Gebeit	748	375	0.37605
Tomistoma schlegelii	IRSNB 154C	Borneo	753	398	0.39819
Tomistoma schlegelii	ZSM 372/1907	Central Borneo, Batang Loepar-seen	767	367	0.380051
Tomistoma schlegelii	USNM 211322	Borneo, Sarawak River	783	354	0.359691
Tomistoma schlegelii	ZSM 370/1907	Central Borneo	812	392	0.395409
Tomistoma schlegelii	BMNH 94.2.21.1	Borneo	839	409	0.38913
Caiman crocodilus apaporiensis	ZMB 37253	Colombia, Upper Rio Apaporis	248.1	147.7	0.567198
Crocodylus intermedius	FMNH 75658	Colombia, Meta Intendencia, Rio Ariari	243.4	102.7	0.358707
Crocodylus intermedius	FMNH 75659	Colombia, Meta Intendencia, Rio Ariari	357	156.2	0.372526
Crocodylus intermedius	FMNH 75661	Colombia, Meta Intendencia, Rio Ariari, ca 250m	367	164.8	0.377391
Crocodylus intermedius	FMNH 75660	Colombia, Meta Intendencia, Rio Ariari	473	219.4	0.404278
Crocodylus intermedius	FMNH 75663	Colombia	478	233.2	0.416852
Crocodylus intermedius	USNM 211281	Venezuela, Orinoco River	490	226.3	0.441501
Crocodylus intermedius	BMNH 1851.8.25.29	Orinoco	516	242.52	0.427368
Crocodylus intermedius	SMF 55155	Colombia	526	263.2	0.449519
Crocodylus intermedius	FMNH 75662	Colombia, Meta Intendencia, Rio Guejar	530	282.3	0.498789
Crocodylus intermedius	SMF 28139	Orinoco	649	361	0.498818
Crocodylus intermedius	BMNH 62.10.19.1	Orinoco	670	335	0.446097
Crocodylus mindorensis	USNM 37435	Philippines, Mindanao Island, Zamboanga	233.5	135.1	0.574964
Crocodylus mindorensis	USNM 228407	Philippines, Luzon Island, Laguna, Siniloan, near Laguna de Bay	324	194.2	0.584026
Crocodylus siamensis	BMNH 1920.1.20.1626	Vietnam, Saigon, Cochinchina	345.9	199.6	0.568441
Crocodylus siamensis	USNM 509430	NA (Hatched in captivity)	282.4	162.5	0.601787
Crocodylus suchus	USNM 248848	Sierra Leone, Northern Bombali, Outamba-Kilimi National Park, Kilimi Section, southern Kilimi	260.5	129.2	0.484286
Crocodylus suchus	USNM 194833	Ivory Coast, Sud Abidjan, near Mcintyre	343	171.7	0.508938
Crocodylus suchus	USNM 194831	Ivory Coast, Sud Abidjan, near Mcintyre	373	186	0.53465

## Sheet: Table S3
Table S3. Fore- and hind limb measurements for fossil taxa. Measurements are in mm.
Taxon	Specimen #	Reference	Humerus length	Ulna length	Metacarpal III length	Femur length	Tibia length	Metatarsal III length	Trunk length (C3-D15)
Anteophthalmosuchus hooleyi	IRSNB R47	Martin et al. 2016; Martin 2017 personal communication	208	156	36	201	144	83	NA
Susisuchus anatoceps	MPSC-R1136	Figueiredo et al. 2011; Figueiredo 2017 personal communication	42.2	32.3	6.7	NA	NA	NA	NA
Susisuchus sp.	MPSC-R1137	Figueiredo and Kellner 2009	NA	NA	NA	37.6	37.8	17.9	NA
Borealosuchus wilsoni	USNM 12990	Direct observation	191.9	138.1	42.1	219.7	160.3	117	862.4
Boverisuchus vorax	USNM 12957	Direct observation (Rossmann 1998, 2000)	143.7	125	28.7	202.4	151.8	85.9	590.2
Boverisuchus bolcensis	MGP-PD 27567	Sacco 1896; Berg 1966; Rossmann 1998; Brochu 2013	NA	NA	NA	160	120	70	NA
Allognathosuchus gracilis	HLMD ME 8008	Rauhe and Rossmann 1995	NA	NA	NA	47	41	23	NA
Navajosuchus mooki	AMNH 6780	Direct observation (Lucas and Estep 2000)	133.4	95.45	27.3	179.8	125.8	73.7	571.7
Wannaganosuchus brachymanus	SMM P76.28.246	Erickson 1982	75	60.9	18	97	78.1	49.2	NA
Alligator prenasalis	YPM PU 13799	Direct observation	97.5	72.1	22.4	120	89.1	58.3	NA
Stangerochampsa mccabei	RTMP.86.61.0	Wu et al. 1996	107	80	33.8	NA	NA	NA	NA
Necrosuchus ionensis	AMNH 3219	Direct observation (Brochu 2011)	NA	NA	NA	153.2	124.7	76.7	NA
Tsoabichi greenriverensis	FMNH unnumbered	Direct observation	29	25.6	9	45.7	41	28.4	NA
Asiatosuchus sp.	MGP-PD 27568 (holotype of Crocodylus vicetinus)	Sacco 1896; Fabiani 1912; Berg 1966; Rauhe and Rossmann 1995	NA	NA	NA	170	140	70.4	NA
Toyotamaphimeia machikanensis	MOU F00001	Kobayashi et al. 2006	403	214	68.3	NA	NA	NA	NA

## Sheet: Table S4
Table S4. Rostral proportions (ratio of the palate width at the last maxillary alveoli to the length from there to the tip of the snout) of fossil and extant species for the comparisons among crocodylian subgroups (figure 8).
Taxonomic group	Species	Specimen	Reference	Rostral proportion
basal alligatoroid	Leidyosuchus canadensis	NMC 8543	Sternberg 1932	0.676056
basal alligatoroid	Diplocynodon darwini	reconstruction	Berg 1966	0.628743
basal alligatoroid	Diplocynodon hantoniensis	BMNH 30392	direct observation	0.637209
basal alligatoroid	Diplocynodon ratelii	MNHN SG12853	Vaillant 1872	0.673611
basal alligatoroid	Diplocynodon muelleri	Spa 4 T2	Piras and Buscalioni 2006	0.709924
basal alligatoroid	Diplocynodon tormis	IPS-9001	Buscalioni et al. 1992	0.585227
basal alligatoroid	Acynodon iberoccitanus	ACAP-FX1	Martin 2007	1.188
Alligatorinae	Ceratosuchus burdoshi	FMNH P 15576	Bartels 1984	1.02556
Alligatorinae	Navajosuchus mooki	AMNH 5186	direct observation	0.759544
Alligatorinae	Procaimanoidea utahensis	USNM 15996	Gilmore 1946	0.513011
Alligatorinae	Wannaganosuchus brachymanus	SMM P76.28.247	Erickson 1982	0.988327
Alligatorinae	Alligator prenasalis	MCZ 1015	Mook 1932	0.778135
Alligatorinae	Alligator mcgrewi	AMNH 7905	direct observation	1.02371
Alligatorinae	Alligator olseni	MCZ 1887	White 1942	0.780669
Alligatorinae	Alligator thompsoni	AMNH 1736	Mook 1923	0.840764
Alligatorinae	Alligator mefferdi	AMNH 7016	direct observation	0.773292
Alligatorinae	Alligator mississippiensis	Multiple individuals	direct observation	0.64
Alligatorinae	Alligator sinensis	Multiple individuals	Cong et al. 1998	0.79
Caimaninae	Brachychampsa montana	AMNH 5032	direct observation	0.935407
Caimaninae	Stangerochampsa mccabei	RTMP.86.61.1	Wu et al. 1996	0.941946
Caimaninae	Albertochampsa langstoni	SMM P67.15.3	Erickson 1972	0.734848
Caimaninae	Paleosuchus palpebrosus	Multiple individuals	direct observation	0.62
Caimaninae	Paleosuchus trigonatus	Multiple individuals	direct observation	0.57
Caimaninae	Orthogenysuchus olseni	AMNH 5178	Mook 1924	0.428023
Caimaninae	Mourasuchus amazonensis	DGM 526-R	Price 1964	0.578378
Caimaninae	Mourasuchus arendsi	UNEFM-CIAAP-1297	Scheyer and Delfino 2016	0.506527
Caimaninae	Purussaurus mirandai	UNEFM-CIAAP-1369	Aguilera et al. 2006	0.774775
Caimaninae	Purussaurus neivensis	UCMP 39074	Langston 1965	0.783784
Caimaninae	Purussaurus brasiliensis	UFAC 1403	Bocquentin-Villanueva et al. 1991	0.865443
Caimaninae	Gnatusuchus pebasensis	MUSM 990	Salas-Gismondi et al. 2015	1.15164
Caimaninae	Kuttanacaiman iquitosensis	MUSM 1490	Salas-Gismondi et al. 2015	1.08943
Caimaninae	Caiman yacare	Multiple individuals	direct observation	0.7
Caimaninae	Caiman crocodilus apaporiensis	ZMB 37253	direct observation	0.57
Caimaninae	Caiman crocodilus crocodilus	Multiple individuals	direct observation	0.65
Caimaninae	Caiman crocodilus fuscus	Multiple individuals	direct observation	0.73
Caimaninae	Caiman latirostris	Multiple individuals	direct observation	0.89
Caimaninae	Caiman lutescens	UCMP 39978	Langston 1965	0.868805
Caimaninae	Melanosuchus fisheri	MCZ 4336	Medina 1976	0.847826
Caimaninae	Melanosuchus niger	Multiple individuals	direct observation	0.68
basal crocodyloid	Prodiplocynodon langi	AMNH 108	direct observation	0.818056
basal crocodyloid	Asiatosuchus germanicus	reconstruction	Berg 1966	0.770213
basal crocodyloid	Crocodylus affinis	AMNH 6177	Mook 1921	0.738636
basal crocodyloid	Crocodylus depressifrons	IRSNB R251	Delfino and Smith 2009	0.629242
basal crocodyloid	Crocodylus acer	AMNH 1240	Mook 1921	0.477969
basal crocodyloid	Brachyuranochampsa eversolei	CM 9372	Zangerl 1944	0.599251
Tomistominae	Maroccosuchus zennaroi	MHNT.PAL.2006.80.11	Jouve et al. 2015	0.562515
Tomistominae	Kentisuchus spenceri	BMNH 38974	direct observation	0.371653
Tomistominae	Megadontosuchus arduini	MGPD 1Z	Piras et al. 2007	0.435271
Tomistominae	Dollosuchoides densmorei	IRSNB 1748	Brochu 2007	0.384118
Tomistominae	Thecachampsa carolinense	ChM PV 4279	Erickson and Sawyer 1996	0.520445
Tomistominae	Thecachampsa antiqua	USNM 25243	direct observation	0.354969
Tomistominae	Toyotamaphimeia machikanensis	MOUF 00001	direct observation	0.463761
Tomistominae	Penghusuchus pani	NMNS-005645	Shan et al. 2009	0.451351
Tomistominae	Tomistoma coppensi	NK 527'88	Pickford 1994	0.329622
Tomistominae	Tomistoma schlegelii	Multiple individuals	direct observation	0.25
Tomistominae	Gavialosuchus eggenburgensis	NHM R 767 cast of holotype	direct observation	0.395196
Tomistominae	Tomistoma lusitanica	Lisbon specimen	Antunes 1961	0.361747
Crocodylus megarhinus	Crocodylus megarhinus	AMNH 5061	direct observation	0.564112
Mekosuchinae	Kambara murgonensis	QM F21115	Willis et al. 1993	0.58614
Mekosuchinae	Kambara implexidens	QM F29662	Salisbury and Willis 1996	0.59116
Mekosuchinae	Baru darrowi	NTM P8695-8	Willis et al. 1990	0.727612
Mekosuchinae	Baru huberi	QM F31060	Willis 1997	0.705495
Mekosuchinae	Baru wickeni	QM F16822	Willis 1997	0.721382
Mekosuchinae	Australosuchus clarkae	reconstruction (mainly of UCMP 71396)	Willis and Molnar 1991	0.611641
Mekosuchinae	Pallimnarchus gracilis	QM F1752	Willis and Molnar 1997	0.712245
Mekosuchinae	Harpacochampsa camfieldensis	reconstruction	Megirian et al. 1991	0.423701
least inclusive clade containing Crocodylus, Mecistops, & Osteolaemus	Euthecodon nitriae	Holotype	Fourtau 1920	0.181818
least inclusive clade containing Crocodylus, Mecistops, & Osteolaemus	Euthecodon arambourgii	MNHN ZEL001	Tchernov 1986	0.279302
least inclusive clade containing Crocodylus, Mecistops, & Osteolaemus	Euthecodon brumpti	KNM-ER1773	Tchernov 1986	0.271028
least inclusive clade containing Crocodylus, Mecistops, & Osteolaemus	Brochuchus pigotti	reconstruction	Conrad et al. 2013	0.529954
least inclusive clade containing Crocodylus, Mecistops, & Osteolaemus	Crocodylus gariepensis	PQ AD1856	Pickford 2003	0.610687
least inclusive clade containing Crocodylus, Mecistops, & Osteolaemus	Voay robustus	AMNH 3101	direct observation	0.840746
least inclusive clade containing Crocodylus, Mecistops, & Osteolaemus	Osteolaemus tetraspis	Multiple individuals	direct observation	0.7
least inclusive clade containing Crocodylus, Mecistops, & Osteolaemus	Osteolaemus osborni	AMNH 10083	direct observation	0.74
least inclusive clade containing Crocodylus, Mecistops, & Osteolaemus	Rimasuchus lloydi	KNM-ER1682	Storrs 2003	0.873539
least inclusive clade containing Crocodylus, Mecistops, & Osteolaemus	Mecistops cataphractus (central African species)	Multiple individuals	direct observation	0.33
least inclusive clade containing Crocodylus, Mecistops, & Osteolaemus	Crocodylus palaeindicus	BMNH 39795	direct observation	0.680221
least inclusive clade containing Crocodylus, Mecistops, & Osteolaemus	Crocodylus thorbjarnarsoni	KNM-ER1683	Brochu and Storrs 2012	0.843621
least inclusive clade containing Crocodylus, Mecistops, & Osteolaemus	Crocodylus checchiai	unnumbered	Maccagno 1948	0.55
least inclusive clade containing Crocodylus, Mecistops, & Osteolaemus	Crocodylus niloticus	IRSNB 5011	direct observation	0.54
least inclusive clade containing Crocodylus, Mecistops, & Osteolaemus	Crocodylus acutus	AMNH 9569	direct observation	0.45
least inclusive clade containing Crocodylus, Mecistops, & Osteolaemus	Crocodylus intermedius	Multiple individuals	direct observation	0.37
least inclusive clade containing Crocodylus, Mecistops, & Osteolaemus	Crocodylus rhombifer	Multiple individuals	direct observation	0.59
least inclusive clade containing Crocodylus, Mecistops, & Osteolaemus	Crocodylus moreletii	Multiple individuals	direct observation	0.63
least inclusive clade containing Crocodylus, Mecistops, & Osteolaemus	Crocodylus siamensis	Multiple individuals	direct observation	0.59
least inclusive clade containing Crocodylus, Mecistops, & Osteolaemus	Crocodylus porosus	Multiple individuals	direct observation	0.48
least inclusive clade containing Crocodylus, Mecistops, & Osteolaemus	Crocodylus johnsoni	Multiple individuals	direct observation	0.35
least inclusive clade containing Crocodylus, Mecistops, & Osteolaemus	Crocodylus novaeguineae	Multiple individuals	direct observation	0.46
least inclusive clade containing Crocodylus, Mecistops, & Osteolaemus	Crocodylus mindorensis	Multiple individuals	direct observation	0.58
least inclusive clade containing Crocodylus, Mecistops, & Osteolaemus	Crocodylus palustris	Multiple individuals	direct observation	0.62

## Sheet: Table S5
Table S5. Pairwise npMANOVAs for all pairs of crocodylian subfamilies, using log10-transformed normalized limb measurements. Holm adjusted p-values are in the upper right, and F-values are in the bottom left. Number in parentheses is sample size for each species. Italicized p-values indicate significant results (p < 0.05).
	Alligatorinae	Caimaninae	Crocodylinae	Osteolaeminae	Gavialinae	Tomistominae
Alligatorinae (26)		0.0015	0.0015	0.0081	0.0015	0.0015
Caimaninae (29)	14.089		0.0015	0.0024	0.0015	0.0015
Crocodylinae (36)	13.117	19.474		0.0102	0.0015	0.0024
Osteolaeminae (9)	5.9812	8.3029	3.8693		0.0024	0.0015
Gavialinae (6)	28.344	14.85	19.555	23.439		0.0081
Tomistominae (8)	18.735	9.6174	7.5948	9.8736	4.7888

## Sheet: Table S6
Table S6. Alternative PGLS regressions using individuals within a set size range (100 mm ≤ skull width ≤ 200 mm; n = 151).
Rostral proportion vs.	n	adjusted R2	F	p	Slope	Intercept	Pagel's lambda
with molecular tree
cHL/entire forelimb	20	0.5067	20.52	0.0002595	-8.55827	4.97914	0
cFL/entire hind limb	20	0.1029	3.178	0.0915	-7.4872	3.9014	0.601
(Fore+hind limbs) / trunk length	17	0.4402	13.58	0.002205	1.40888	-0.86374	0.796
with morphological tree
cHL/entire forelimb	20	0.5067	20.52	0.0002595	-8.55827	4.97914	0
cFL/entire hind limb	20	0.3259	10.18	0.005058	-12.3079	6.0776	0
(Fore+hind limbs) / trunk length	17	0.4996	16.97	0.0009089	1.7066	-1.17706	0.764
